# Supplementary material for: Comparison of Management for Central Venous Stenosis With or Without Previous Catheter Placement
Source: PubMed Central journal article supplement (PMC8490807; doi:10.3389/fneur.2021.703286), 2021-09-21

# Supplemental Figure 1

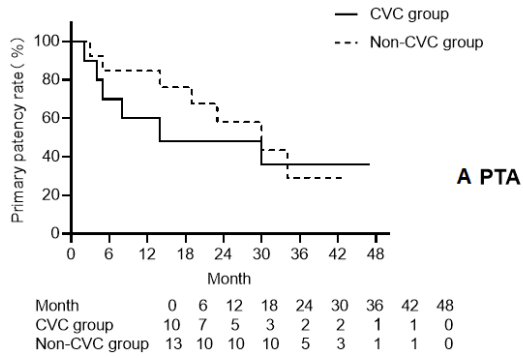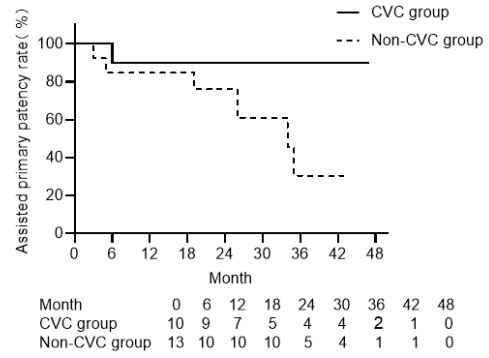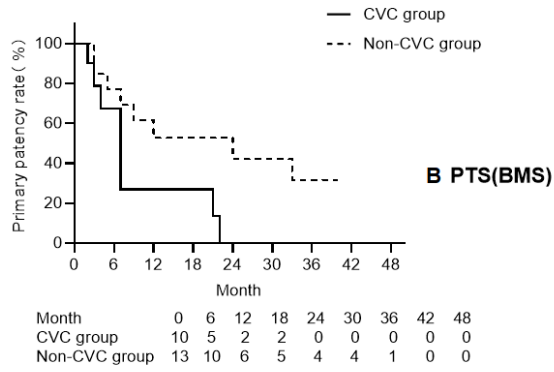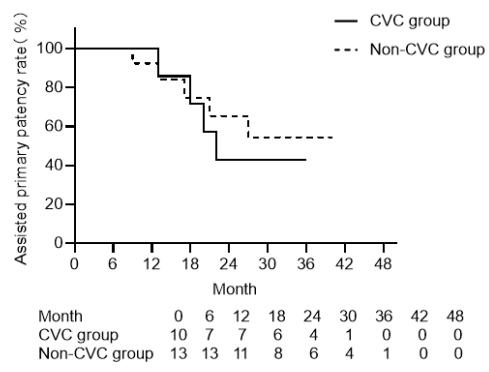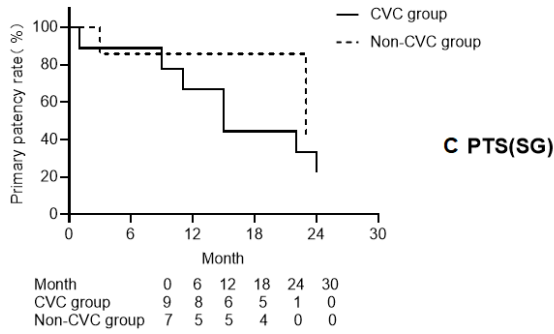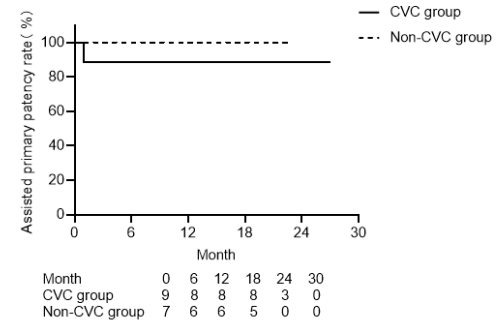

# Supplemental Figure 2

**A Primary patency rate between PTS ( BMS) and PTS(SG) for landmrk analysis**

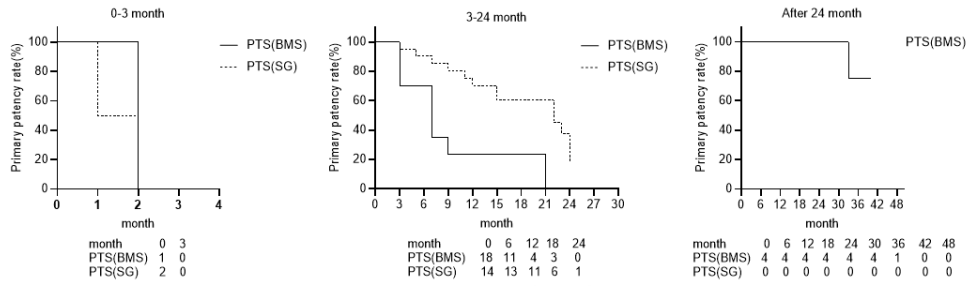

**B Assisted primary patency rate between PTS ( BMS) and PTS(SG) for landmrk analysis**

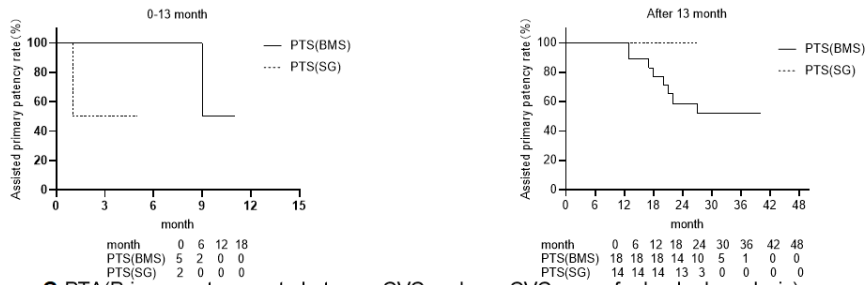

**C PTA(Primary patency rate between CVC and non-CVC group for landmrk analysis)**

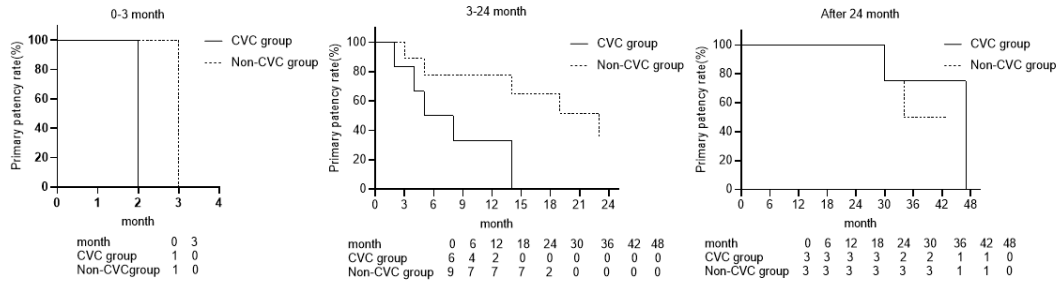

**D PTS (BMS)(Primary patency rate between CVC and non-CVC group for landmrk analysis)**

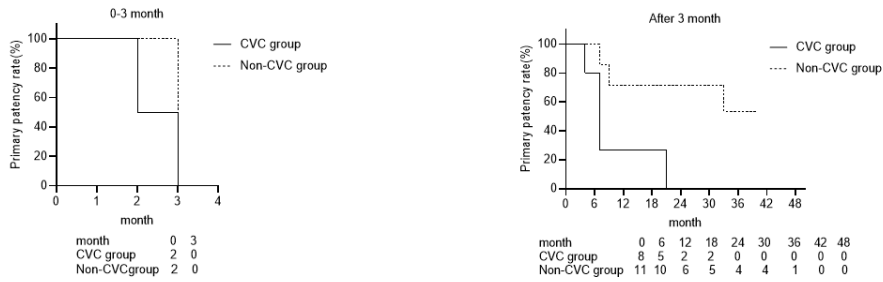

Supplement: Image_1.pdf [file Image_1.pdf]
